# Supplementary material for: Electrokinetically-Driven Assembly of Gold Colloids into Nanostructures for Surface-Enhanced Raman Scattering
Source: MDPI journal article supplement (doi:10.3390/nano10040661), 2020-04-02
Supplement: s1 [file s1]

## Supplementary Material

# Electrokinetically-Driven Assembly of Gold Colloids into Nanostructures for Surface-Enhanced Raman Scattering

Hannah Dies <sup>1</sup>, Adam Bottomley <sup>2</sup>, Danielle Lilly Nicholls <sup>3</sup>, Kevin Stamplecoskie <sup>2</sup>, Carlos Escobedo <sup>1</sup> and Aristides Docoslis <sup>1,\*</sup>

<sup>1</sup> Department of Chemical Engineering, Queen's University, Kingston, ON, K7L 3N6, Canada; h.dies@queensu.ca (H.D.); ce32@queensu.ca (C.E.)

<sup>2</sup> Department of Chemistry, Queen's University, Kingston, ON, K7L 3N6, Canada; adam.bottomley@protonmail.com (A.B.); kevin.stamplecoskie@queensu.ca (K.S.)

<sup>3</sup> School of Medicine, University of Toronto, Toronto, ON, M5S 1A8, Canada; lilly.nicholls@mail.utoronto.ca

\* Correspondence: docoslis@queensu.ca; Tel.: +01-(613)-533-6949

Received: 7 March 2020; Accepted: 31 March 2020; Published: date

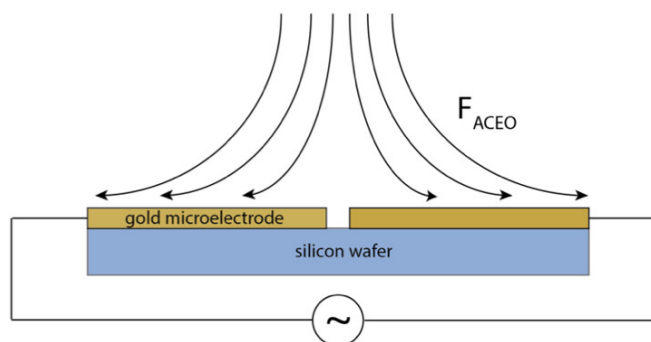

**Figure S1.** The direction of alternating current electroosmosis (ACEO) above the microelectrode surface. Schematic is not to scale.

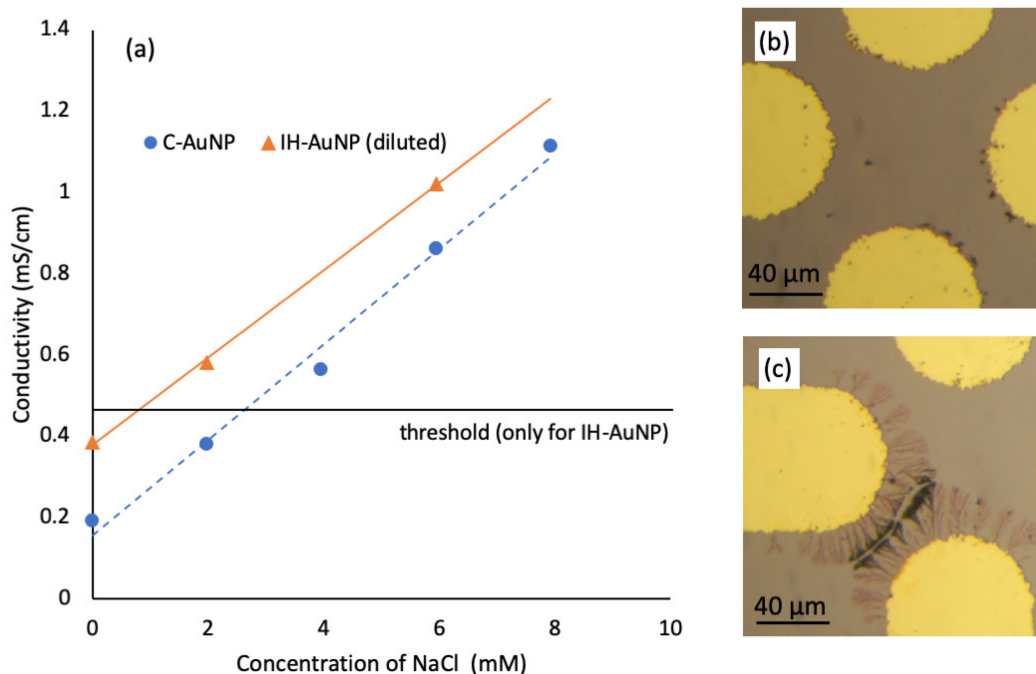

**Figure S2.** Nanostructure assembly with the addition of NaCl. (a) The NaCl addition was able to “rescue” the diluted in house Au NPs (IH-Au NPs); i.e. all points above the indicated threshold conductivity produced nanostructures. Conversely, the addition of NaCl to the Cytodiagnostics Au NPs (C-Au NPs) did not enable nanostructure growth at any experimental conductivities. (b) Results from attempted nanostructure assembly (at 10 kHz, 4.5 V amplitude) with C-Au NPs above the threshold conductivity. (c) Results from nanostructure assembly (at 10 kHz, 4.5 V amplitude) with IH-AuNPs above the threshold conductivity.

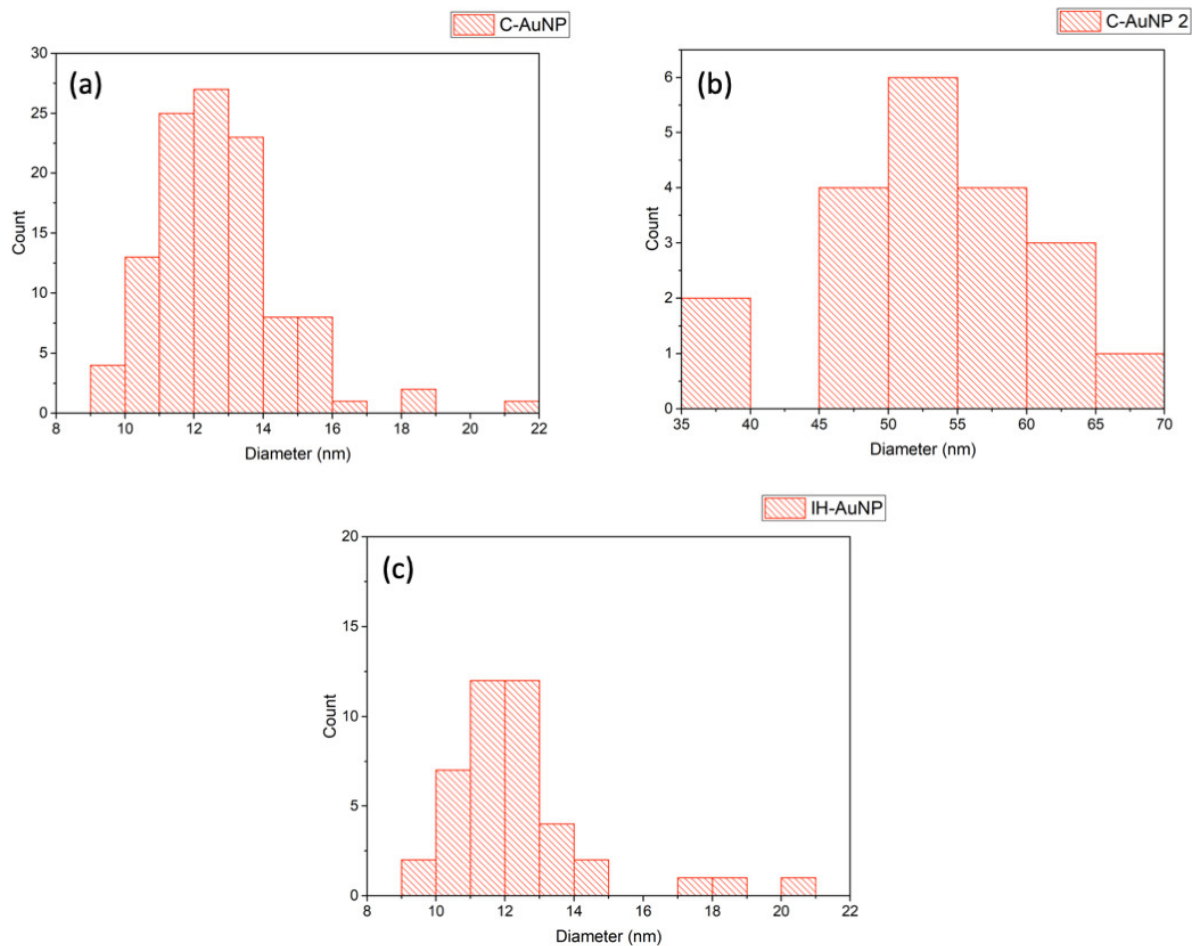

**Figure S3.** Nanoparticle size distribution histograms obtained from the TEM images (shown in Figure S4). (a) The Cyodiagnosics Au NP smaller diameter size distribution: average  $12.8 \pm 1.9$  nm. (b) The Cyodiagnosics Au NP larger diameter size distribution: average  $53.4 \pm 7.9$  nm. (c) The in-house prepared Au NP (unimodal) size distribution:  $12.4 \pm 2.1$  nm.

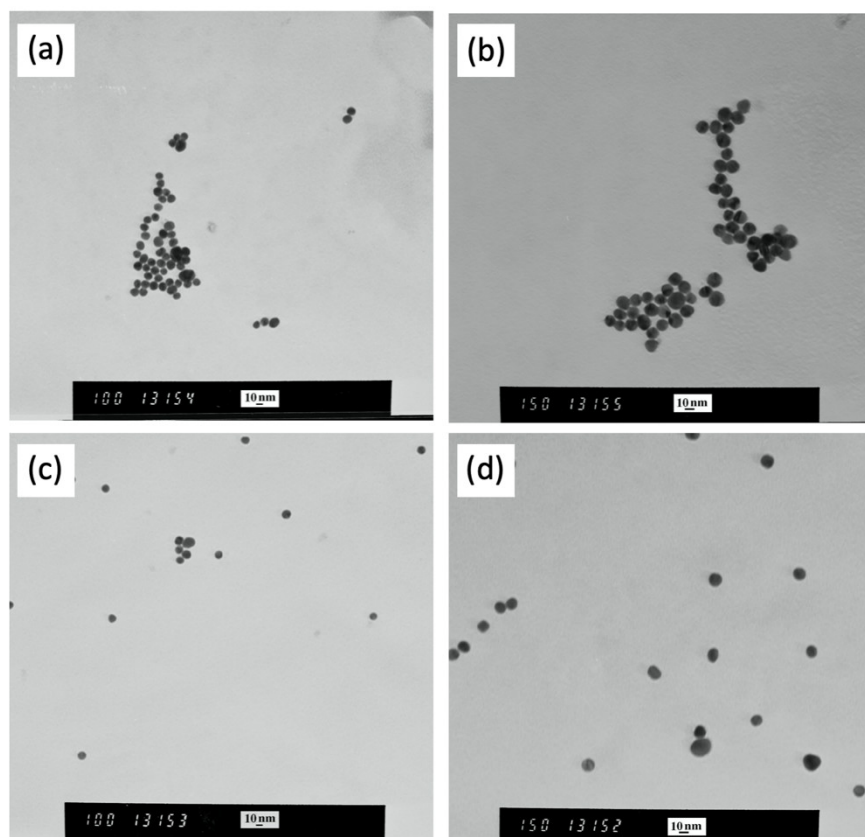

**Figure S4.** TEM images used for nanoparticle size distribution histograms. (a) and (b) are TEM images of the Cytodiagnostics Au NPs, and (c) and (d) are TEM images of the in-house prepared Au NPs.

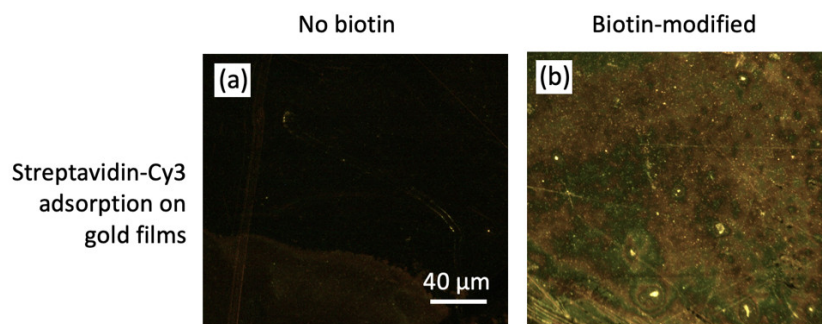

**Figure S5.** The fluorescence images for visualization of streptavidin-Cy3 capture. (a) Fluorescent image of a non-biotinylated (only cysteamine-coated) gold film. (b) Fluorescent image of a biotinylated gold film.

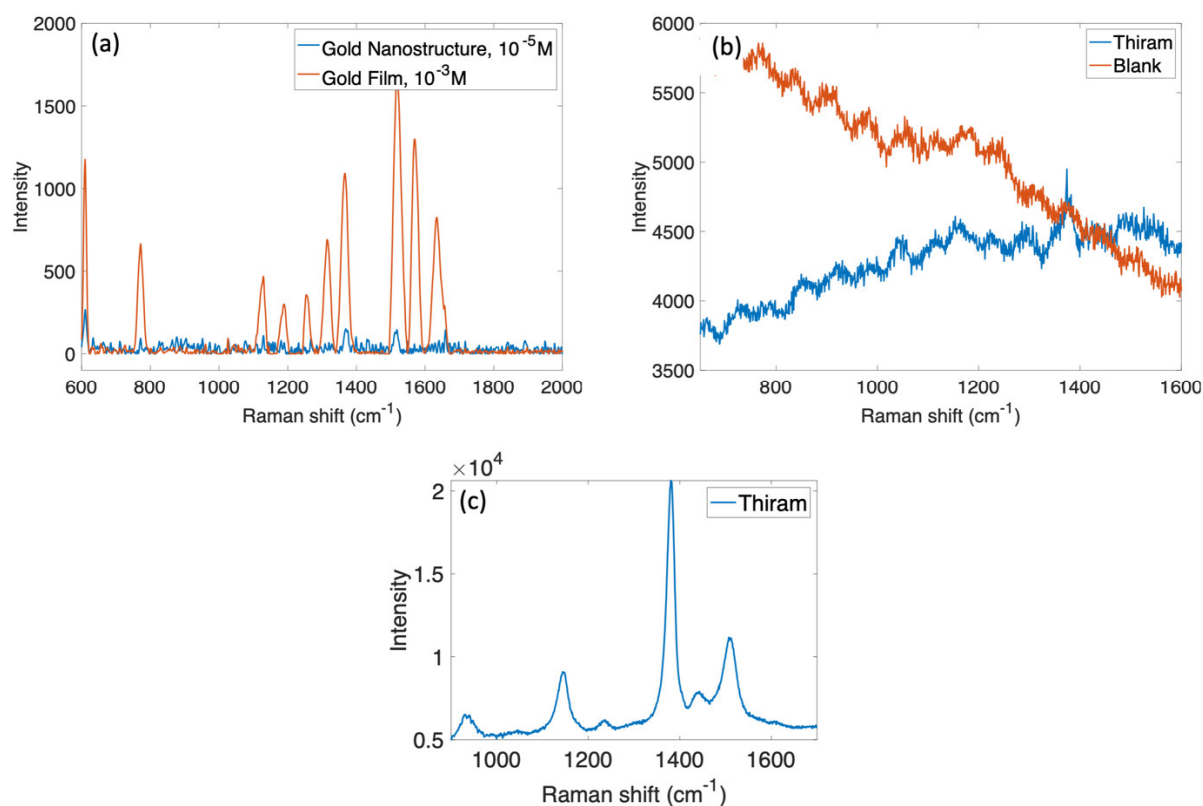

**Figure S6:** Supplementary data to the SERS spectra presented in Figure 4. (a) Unprocessed data for R6G on SERS substrates and gold films. This reading had an automatic background subtraction (polynomial), however no filtering (Savitsky-Golay) of the data was done. The filtered data is shown in Figure 4(a). (b) Unprocessed data (no background subtraction, no filtering) for thiram on SERS substrates and blank SERS substrates. The processed data is shown in Figure 4(b). (c) 100 ppm thiram on a gold SERS substrate.

**Table S1.** Results from the addition of gold salts to the C-AuNP suspensions. Both salt solutions were above the previously established conductivity threshold.

| Salt Solution                        | Concentration of HAuCl <sub>4</sub> | Results                                        |
|--------------------------------------|-------------------------------------|------------------------------------------------|
| 6 mM NaCl                            | 1 μM                                | No effect (did not grow)                       |
|                                      | 10 μM                               | Damaging to microelectrodes                    |
|                                      | 100 μM                              | Nanoparticles aggregated                       |
| 3 mM Na <sub>2</sub> SO <sub>4</sub> | 1 μM                                | No effect (grew as before, still no branching) |
|                                      | 10 μM                               | Nanoparticles aggregated                       |
